# Supplementary material
Source: Springer Nature journal article supplement (https://www.springermedizin.de/resource/supplementary/12887_2009_318_MOESM2_ESM.pdf/9474958)

Number of sucking movements per minute of feeding

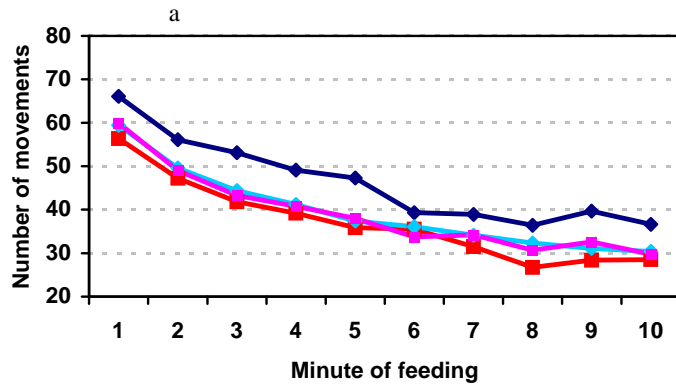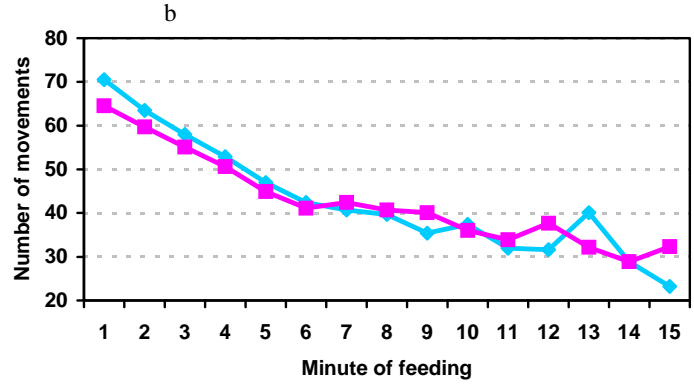

Number of pauses per minute of feeding

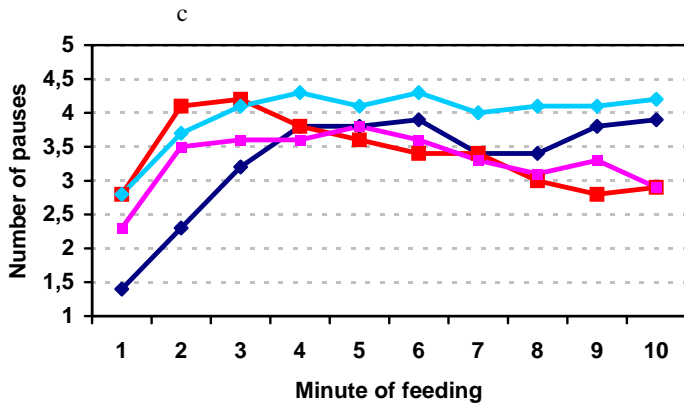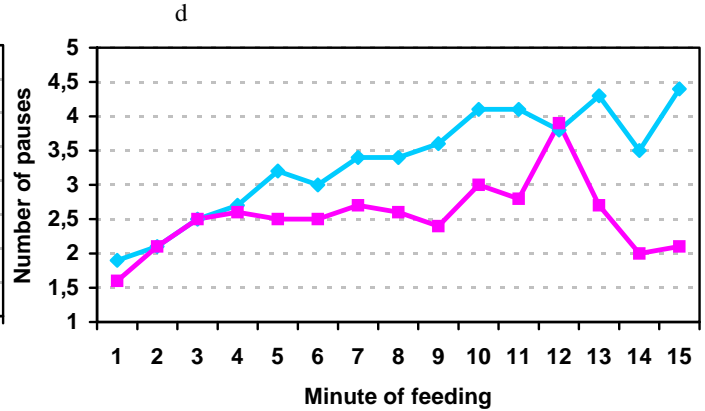

Duration of pauses per minute of feeding (seconds)

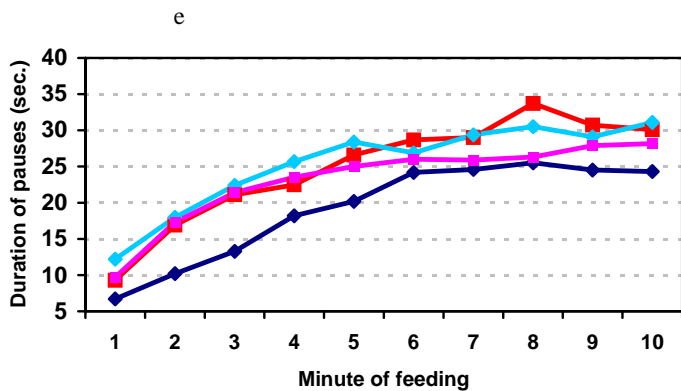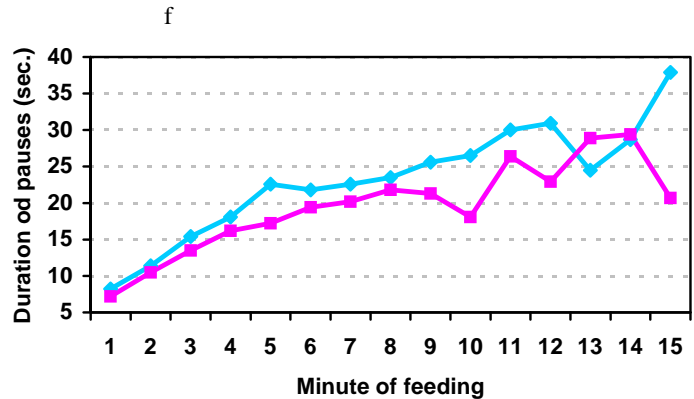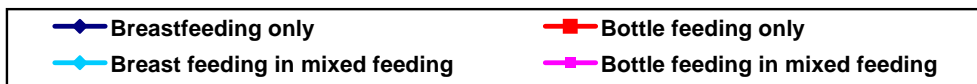

Supplement: MOESM2 [file 9474958]
